# Supplementary material
Source: publisher site journal article supplement (https://www.dovepress.com/get_supplementary_file.php?f=436242.docx)
Supplement: Supplementary file 1 [file get_supplementary_file.php]

**Supplementary Tables**

| **Supplementary Table 1: Differences in parameters of pulmonary vessels among normal, high-risk for COPD and COPD groups** | | | | |
| --- | --- | --- | --- | --- |
|  | | Normal  (n=1776) | High-risk  (n=90) | COPD  (n=103) |
|
| Parameters of small pulmonary vessels (at 15mm~24mm depth from the pleural surface) | | | | |
| 15mm | No. Vessels(ea) | 740±199.34 | 641.83±186.27a | 855.95±205.67a,b |
| No. Vessels CSA< 5mm2(ea) | 359.46±126.56 | 309.03±119.75a | 441.59±136.1a,b |
| Surface Area of LAA(mm2) | 3912.65±5070.18 | 4177.93±6784.44 | 13357.77±17496.91a,b |
| Total Surface Area(mm2) | 115650.04±33705.53 | 99310.56±33340.74a | 143174.19±36567.48a,b |
| 18mm | No. Vessels(ea) | 547.6±165.2 | 468.12±156.44a | 652.11±168.77a,b |
| No. Vessels CSA< 5mm2(ea) | 246.96±95.64 | 213.74±92.26a | 310.15±105.85a,b |
| Surface Area of LAA(mm2) | 2792.16±3825.07 | 2976.35±5185.47 | 10146.77±14429.16a,b |
| Total Surface Area(mm2) | 87018.61±28867.28 | 73215.02±28261.04a | 110760.53±31589.09a,b |
| 21mm | No. Vessels(ea) | 400.9±140.63 | 334.37±137.56a | 489.53±147.03a,b |
| No. Vessels CSA< 5mm2(ea) | 179.34±78.52 | 150.98±76.13a | 228.17±89.02a,b |
| Surface Area of LAA(mm2) | 2089.05±3063.84 | 2246.56±4182.8 | 8208.36±12694.36a,b |
| Total Surface Area(mm2) | 66705.99±25691.73 | 54748.11±24738.22a | 88418.47±28662.63a,b |
| 24mm | No. Vessels(ea) | 284.26±119.15 | 227.57±111.26a | 368.84±126.81a,b |
| No. Vessels CSA< 5mm2(ea) | 129.17±65.06 | 104.23±59.81a | 176.92±76.38a,b |
| Surface Area of LAA(mm2) | 1473.29±2326.82 | 1580.19±3131.64 | 6318.28±10549.37a,b |
| Total Surface Area(mm2) | 47649.39±21647.41 | 37690.43±20346.29a | 66371.41±24828.75a,b |
| Note: Data are shown as mean±standard deviation.  a Significant difference with “normal” subjects (p < 0.05).  b Significant difference with “high-risk” subjects (p < 0.05). | | | | |

| **Supplementary Table 2: Differences in pulmonary vessel parameters among never-smokers, current-smokers and former-smokers in normal group** | | | | |
| --- | --- | --- | --- | --- |
|  | | Never smoker  (n=1317) | Current smoker  (n=338) | Former smoker  (n=121) |
|
| Parameters of small pulmonary vessel (at 6mm~12mm depth from the pleural surface) | | | | |
| 6mm | No. Vessels(ea) | 1902.44±513.38 | 2324.79±596.42a | 2153.42±649.1a,b |
| No. Vessels CSA< 5mm2(ea) | 1603.61±473.12 | 1975.56±533.45a | 1829.5±578.92a,b |
| Surface Area of LAA(mm2) | 8154.62±8986.11 | 14696.74±12745.96a | 14435.99±13795.74a |
| Total Surface Area(mm2) | 204925.2±41199.53 | 251445.66±41339.37a | 243449.8±44413.73a |
| 9mm | No. Vessels(ea) | 1402.64±320.44 | 1775.12±365.55a | 1663.69±406.38a,b |
| No. Vessels CSA< 5mm2(ea) | 979.33±288.37 | 1270.87±314.23a | 1186.2±336.72a,b |
| Surface Area of LAA(mm2) | 5991.37±7007.91 | 10888.18±10281.82a | 10872.32±10969.21a |
| Total Surface Area(mm2) | 165638.26±36490.27 | 207829.13±37224.55a | 200319.69±39579.67a |
| 12mm | No. Vessels(ea) | 968.94±226.4 | 1255.52±253.14a | 1171.75±267.87a,b |
| No. Vessels CSA< 5mm2(ea) | 544.33±175.26 | 736.53±191.24a | 680.33±193.49a,b |
| Surface Area of LAA(mm2) | 4204.82±5212.43 | 7755.89±7957.29a | 7819.16±8356.83a |
| Total Surface Area(mm2) | 130008.68±32219.29 | 166837.16±33402.2a | 159708.46±35281.08a |
| Parameters of pulmonary vessel volume | | | | |
| Lung Volume(cc) | | 4022.97±996.52 | 5169.77±1072.8a | 4941.54±1122.25a |
| TBV(cc) | | 235.22±52.76 | 300.01±62.94a | 287.71±84.31a,b |
| BV1(cc) | | 9.56±3.19 | 12.98±4.08a | 11.42±4.02a,b |
| BV5(cc) | | 112.78±28.9 | 146.82±37.84a | 134.57±39.27a,b |
| BV1/TBV | | 0.04±0.01 | 0.04±0.01a | 0.04±0.01a |
| BV5/TBV | | 0.48±0.05 | 0.49±0.05a | 0.47±0.05b |
| Note: Data are shown as mean±standard deviation.  a Significant difference with “never smokers” (p < 0.05).  b Significant difference with “current smokers” (p < 0.05). | | | | |

| **Supplementary Table 3: Differences in pulmonary vessel parameters between smokers, non-smokers and former smokers in COPD group** | | | | |
| --- | --- | --- | --- | --- |
|  | | Never smokers  (n=49) | Current smokers  (n=39) | Former smokers  (n=15) |
|
| Parameters of small pulmonary vessel (at 6mm~12mm depth from the pleural surface) | | | | |
| 6mm | No. Vessels(ea) | 1772.37±674.86 | 1941.18±662.46 | 1873.73±408.17 |
| No. Vessels CSA< 5mm2(ea) | 1492.96±602.9 | 1658.26±582.23 | 1593±389.21 |
| Surface Area of LAA(mm2) | 16726.16±16746.1 | 36821.09±26050.35a | 39231.2±40451.06a |
| Total Surface Area(mm2) | 226352.75±47682.84 | 277417.84±33096.7a | 268126.19±38272.94a |
| 9mm | No. Vessels(ea) | 1465.8±414.88 | 1735.92±361.55a | 1656.13±307.97 |
| No. Vessels CSA< 5mm2(ea) | 1048.16±338.63 | 1289.36±292.36a | 1212.47±298.25 |
| Surface Area of LAA(mm2) | 12342.61±13671.37 | 29250.79±22833.22a | 32345.76±35835.63a |
| Total Surface Area(mm2) | 184772.32±42760.25 | 231623.54±29928.99a | 223500.35±35894.23a |
| 12mm | No. Vessels(ea) | 1064.65±268.03 | 1303.33±228.52a | 1203±224.65 |
| No. Vessels CSA< 5mm2(ea) | 628.39±188.24 | 810.46±180.7a | 715.47±196.17 |
| Surface Area of LAA(mm2) | 8716.4±10676.35 | 22364.18±19458.62a | 25753.37±30652.12a |
| Total Surface Area(mm2) | 146686.56±37401.66 | 188937.71±27173.48a | 181411.8±33095.23a |
| Parameters of pulmonary vessel volume | | | | |
| Lung Volume(cc) | | 4529.01±1180.02 | 5878.59±945.31a | 5660.09±1095.88a |
| TBV(cc) | | 272.11±85.44 | 335.6±86.42a | 305.08±64.67 |
| BV1(cc) | | 10.28±3.26 | 12.74±3.8a | 10.99±3.68 |
| BV5(cc) | | 120.29±34.61 | 146.13±35.68a | 135.39±31.96 |
| BV1/TBV | | 0.04±0.01 | 0.04±0.01 | 0.04±0.01 |
| BV5/TBV | | 0.48±0.05 | 0.48±0.05 | 0.46±0.04 |
| Note: Data are shown as mean±standard deviation.  a Significant difference with “never smokers” (p < 0.05). | | | | |
